# Supplementary material for: Fission Yeast NDR/LATS Kinase Orb6 Regulates Exocytosis via Phosphorylation of the Exocyst Complex
Source: PubMed Central journal article supplement (PMC6367570; doi:10.1016/j.celrep.2019.01.027), 2019-02-05
Supplement: mmc1.pdf [file mmc1.pdf]

**Cell Reports, Volume 26**

**Supplemental Information**

**Fission Yeast NDR/LATS Kinase Orb6  
Regulates Exocytosis via Phosphorylation  
of the Exocyst Complex**

**Ye Dee Tay, Marcin Leda, Christos Spanos, Juri Rappsilber, Andrew B. Goryachev, and Kenneth E. Sawin**

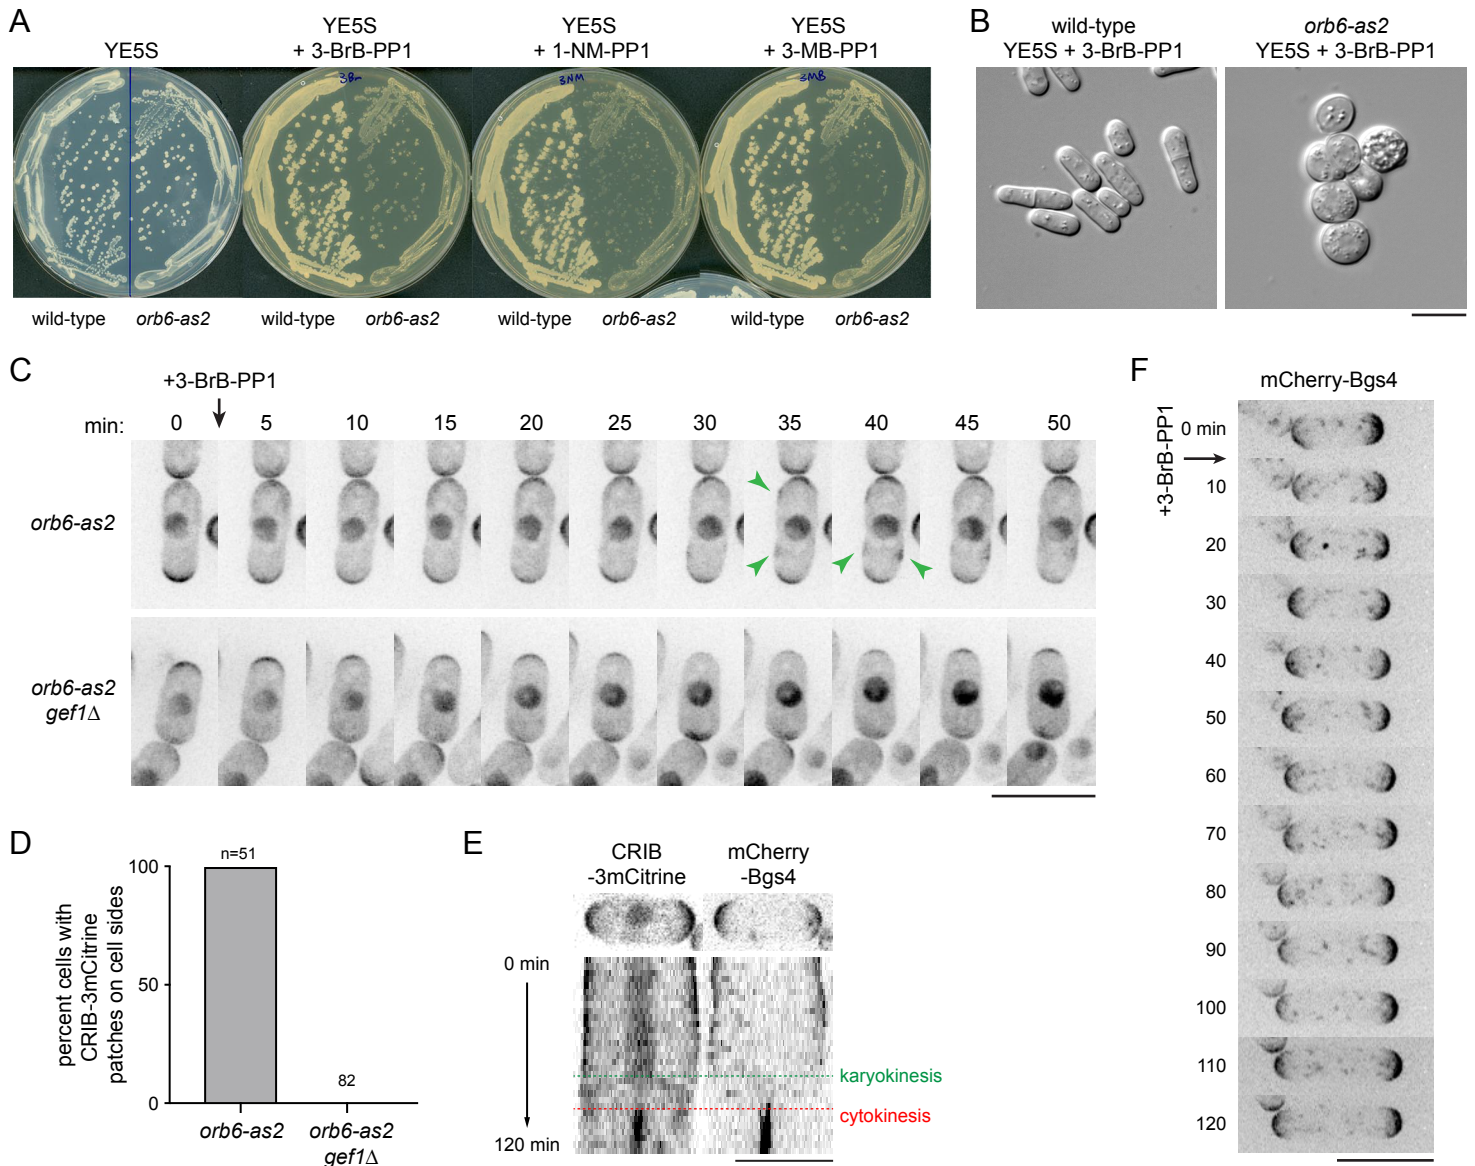

**Figure S1. Additional characterization of *orb6-as2* and effects of 3-BrB-PP1. Related to Figures 1 and 2.**

(A) Wild-type and *orb6-as2* colonies after replica-planting to the different indicated nucleotide-competitive analogs (each analog at 30  $\mu$ M final concentration). All analogs inhibited growth of *orb6-as2* cells. Plates were incubated at 32°C for 2 days.

(B) DIC images of wild-type and *orb6-as2* cells taken from YE5S + 3-BrB-PP1 plate. On solid media at 32°C, Orb6-inhibited cells are rounder than in liquid medium at 25°C; this is partly due to elevated temperature (see Figure 1).

(C) CRIB-3mCitrine (Cdc42-GTP reporter) localization in interphase *orb6-as2* and *orb6-as2 gef1Δ* cells before and after Orb6 inhibition with 3-BrB-PP1. After Orb6 inhibition, ectopic patches of CRIB-3mCitrine are observed in *orb6-as2* cells (arrowheads) but not in *orb6-as2 gef1Δ* cells.

(D) Quantification of ectopic CRIB-3mCitrine patches from experiments as in (C).

(E) Temporal correlation of CRIB-3mCitrine and mCherry-Bgs4 localization to cell tips during interphase and to the division site during cell division.

(F) Addition of 3-BrB-PP1 (30  $\mu$ M) to wild-type cells does not affect mCherry-Bgs4 localization or interphase cell elongation.

Bars, 10  $\mu$ m. Three biological replicates were performed for (C) and (E). Experiments for (A), (B) and (F) were performed once.

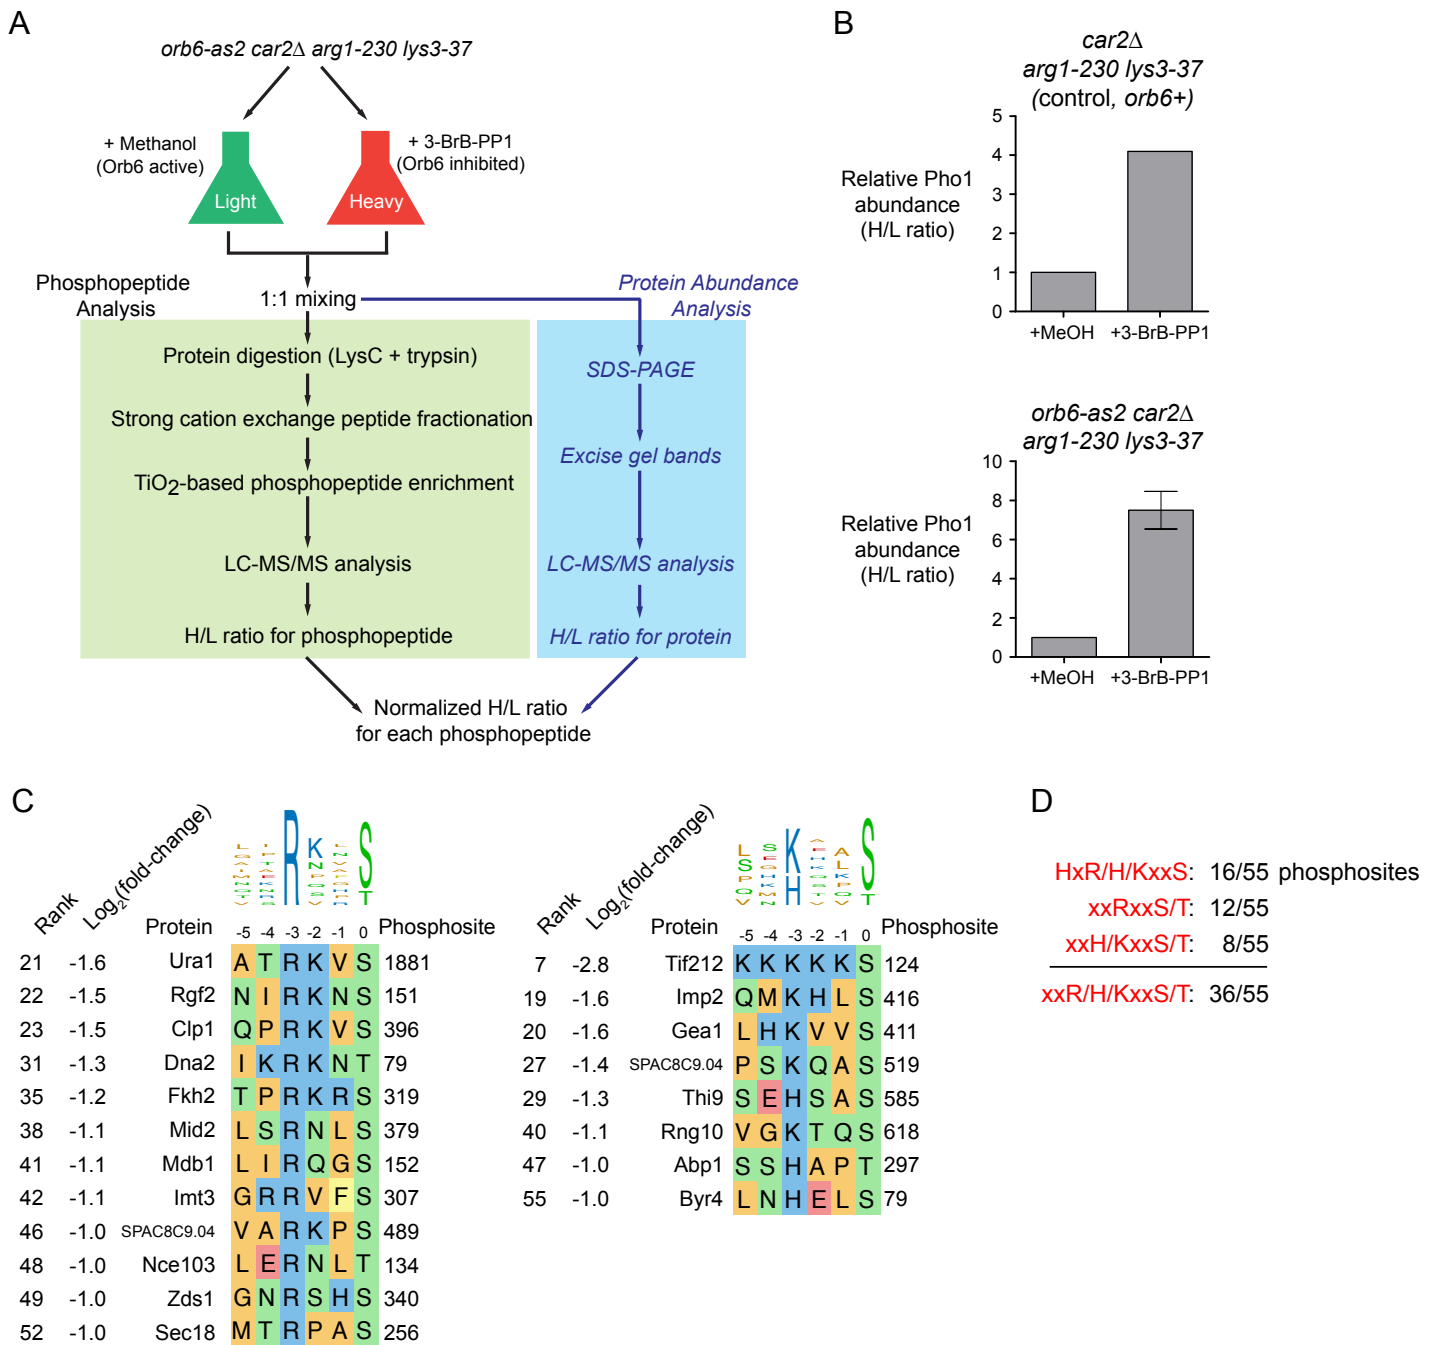

**Figure S2. Quantitative global phosphoproteomics analysis after Orb6 inhibition. Related to Figure 4.**

(A) Workflow for SILAC quantitative global phosphoproteomics analysis. Because relative abundance of individual proteins may change as a result of Orb6 inhibition, abundance of individual proteins before and after Orb6 inhibition is used to normalize H/L ratios of the relevant phosphopeptides.

(B) Relative abundance of acid phosphatase Pho1 after 3-BrB-PP1 addition to control wild-type (*orb6+*) cells and *orb6-as2* cells. Error bar indicates SD from three biological replicates. Relative abundances of other acid phosphatases SPAC4.06 and Pho4 were not significantly changed after 3-BrB-PP1 addition.

(C) Alignment of selected highest-confidence Orb6-dependent phosphosites containing basic residues R or H/K at -3 position. All phosphosites shown were quantified in all three replicate global phosphoproteomics experiments and showed a two-fold or greater mean decreased phosphorylation after Orb6 inhibition. Phosphosites are ranked by fold-decrease in phosphorylation (see Figure 4B and Table S2).

(D) Consensus summary of features of highest-confidence Orb6-dependent phosphosites from (C), together with sites with perfect match to NDR/LATS consensus HxR/H/KxxS/T (Figure 4B). 36 out of 55 sites include a basic residue at -3 position.

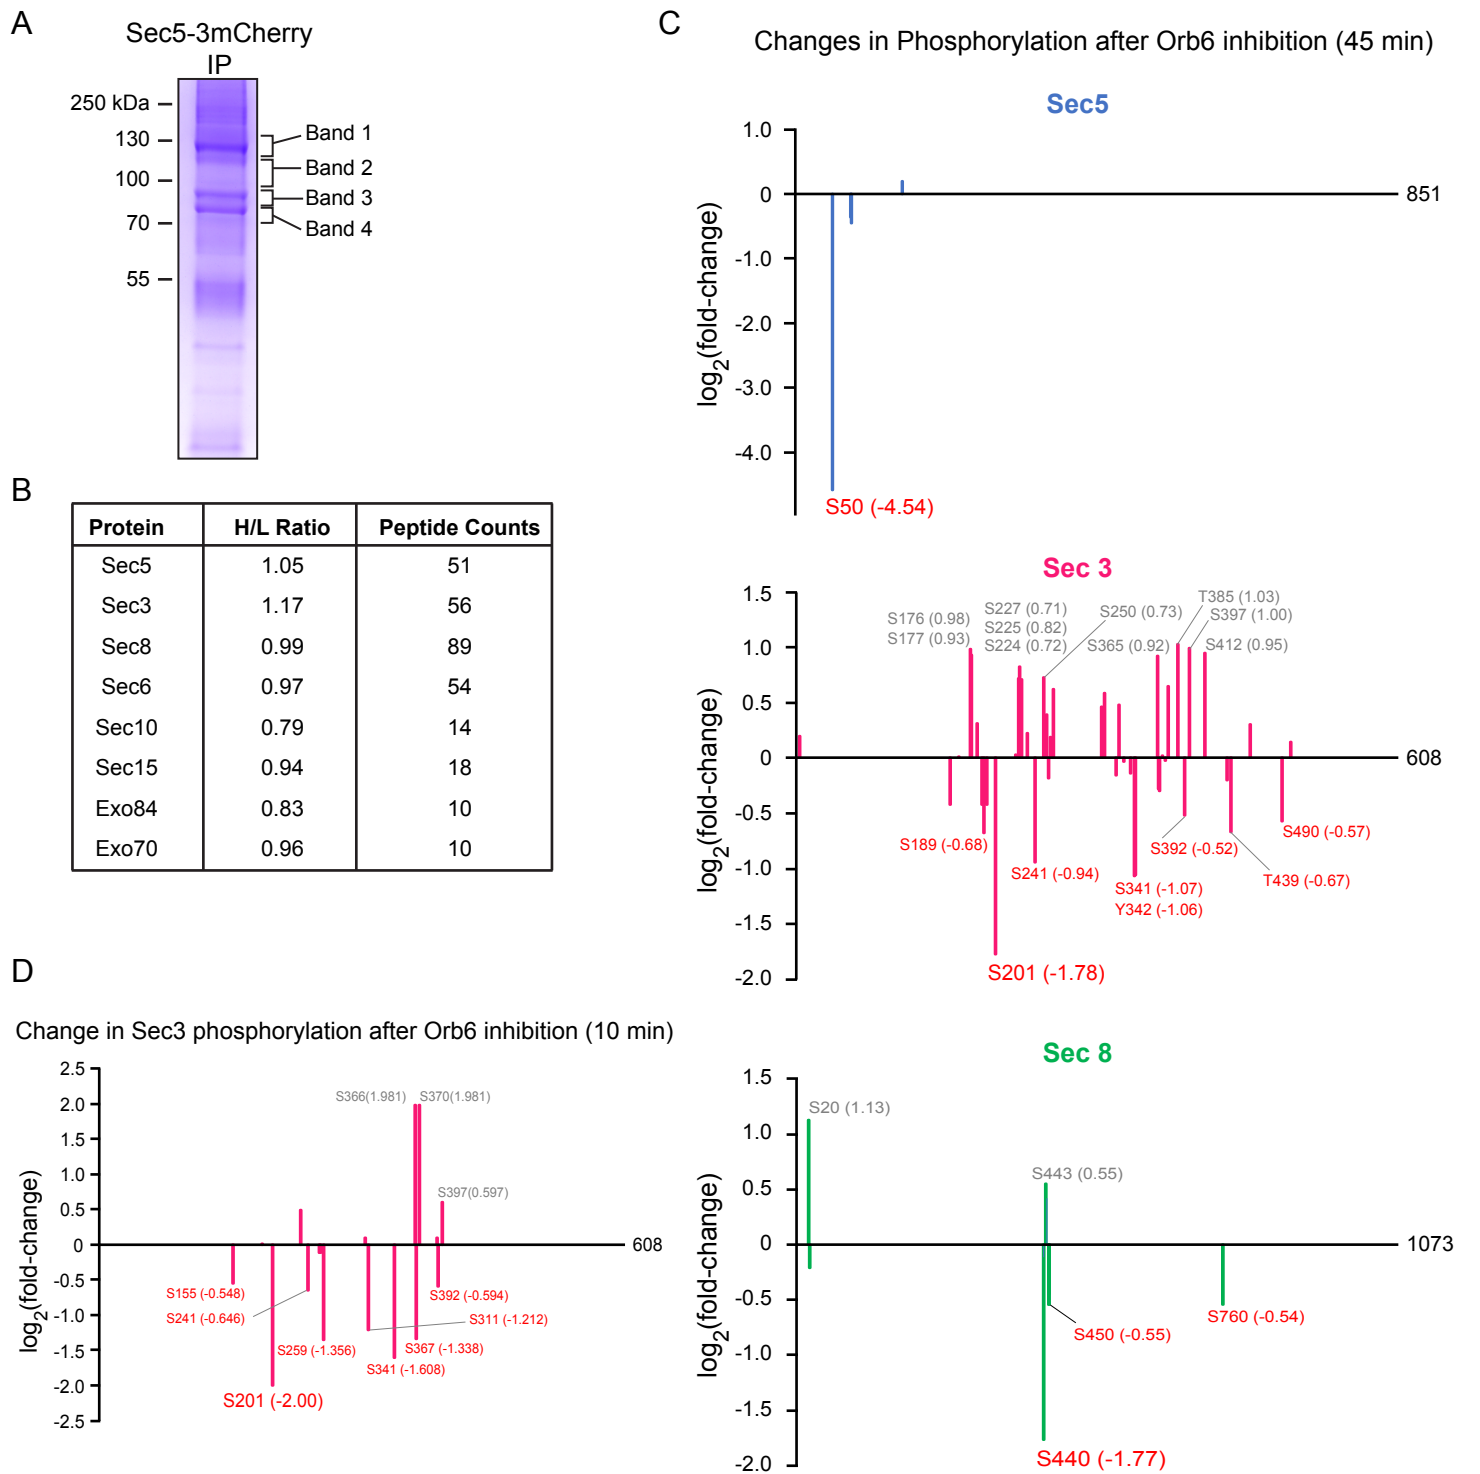

**Figure S3. Additional confirmation of changes in phosphorylation of exocyst proteins after Orb6 inhibition. Related to Figure 4.**

(A) SDS-PAGE showing immunoprecipitated Sec5-3mCherry and coimmunoprecipitated proteins, from a mixture of SILAC “heavy”-labelled Orb6-inhibited *orb6-as2* cells and “light”-labelled non-inhibited *orb6-as2* cells. Heavy-labelled cells were treated with 3-BrB-PP1, while light-labelled cells were treated with methanol. Indicated bands were excised and processed for tandem mass spectrometry.

(B) Relative abundances of exocyst proteins present in SILAC Sec5-3mCherry immunoprecipitate from (A) before and after Orb6 inhibition, based on SILAC heavy:light ratio (H/L ratio). All ratios are close to 1, suggesting that Orb6 inhibition does not grossly alter exocyst integrity. Note that H/L ratios here are specific to individual proteins immunoprecipitating with Sec5-3mCherry before vs. after Orb6 inhibition and are not indicating protein stoichiometry within the exocyst complex.

(C) Fold-changes in phosphorylation of individual phosphosites in Sec5, Sec3, and Sec8 after Orb6 inhibition for 45 minutes. X-axes show position of phosphosites in the respective proteins (Sec5 is 851 amino acids, Sec3 is 608 amino acids, and Sec8 is 1073 amino acids). Y-axes show  $\log_2(\text{fold-change})$  in phosphorylation of relevant phosphosites after Orb6 inhibition. Among exocyst proteins, only Sec5, Sec3 and Sec8 showed significant changes in phosphorylation after Orb6 inhibition.

(D) Fold-changes in Sec3 phosphorylation after Orb6 inhibition for 10 minutes. In the 10-minute inhibition experiment, phosphorylation of Sec5-S50 and Sec8-440 was not detectable.

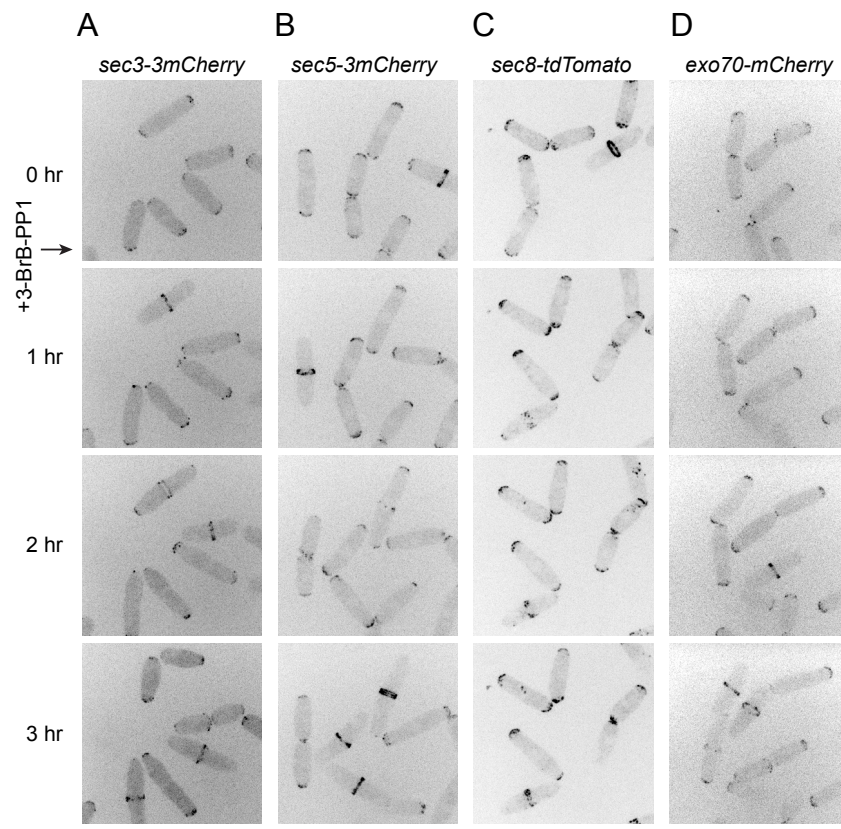

**Figure S4. 3-BrB-PP1 treatment of wild-type cells does not affect exocyst localization. Related to Figure 6.**

Localization of the indicated fluorescently-tagged exocyst proteins in wild-type (*orb6+*) cells, before 3-BrB-PP1 addition and at different times after 3-BrB-PP1 addition. In each column (A-D), the same fields of cells were imaged at all timepoints.

Bar, 10  $\mu$ m. Imaging experiments for (A-D) were performed once.



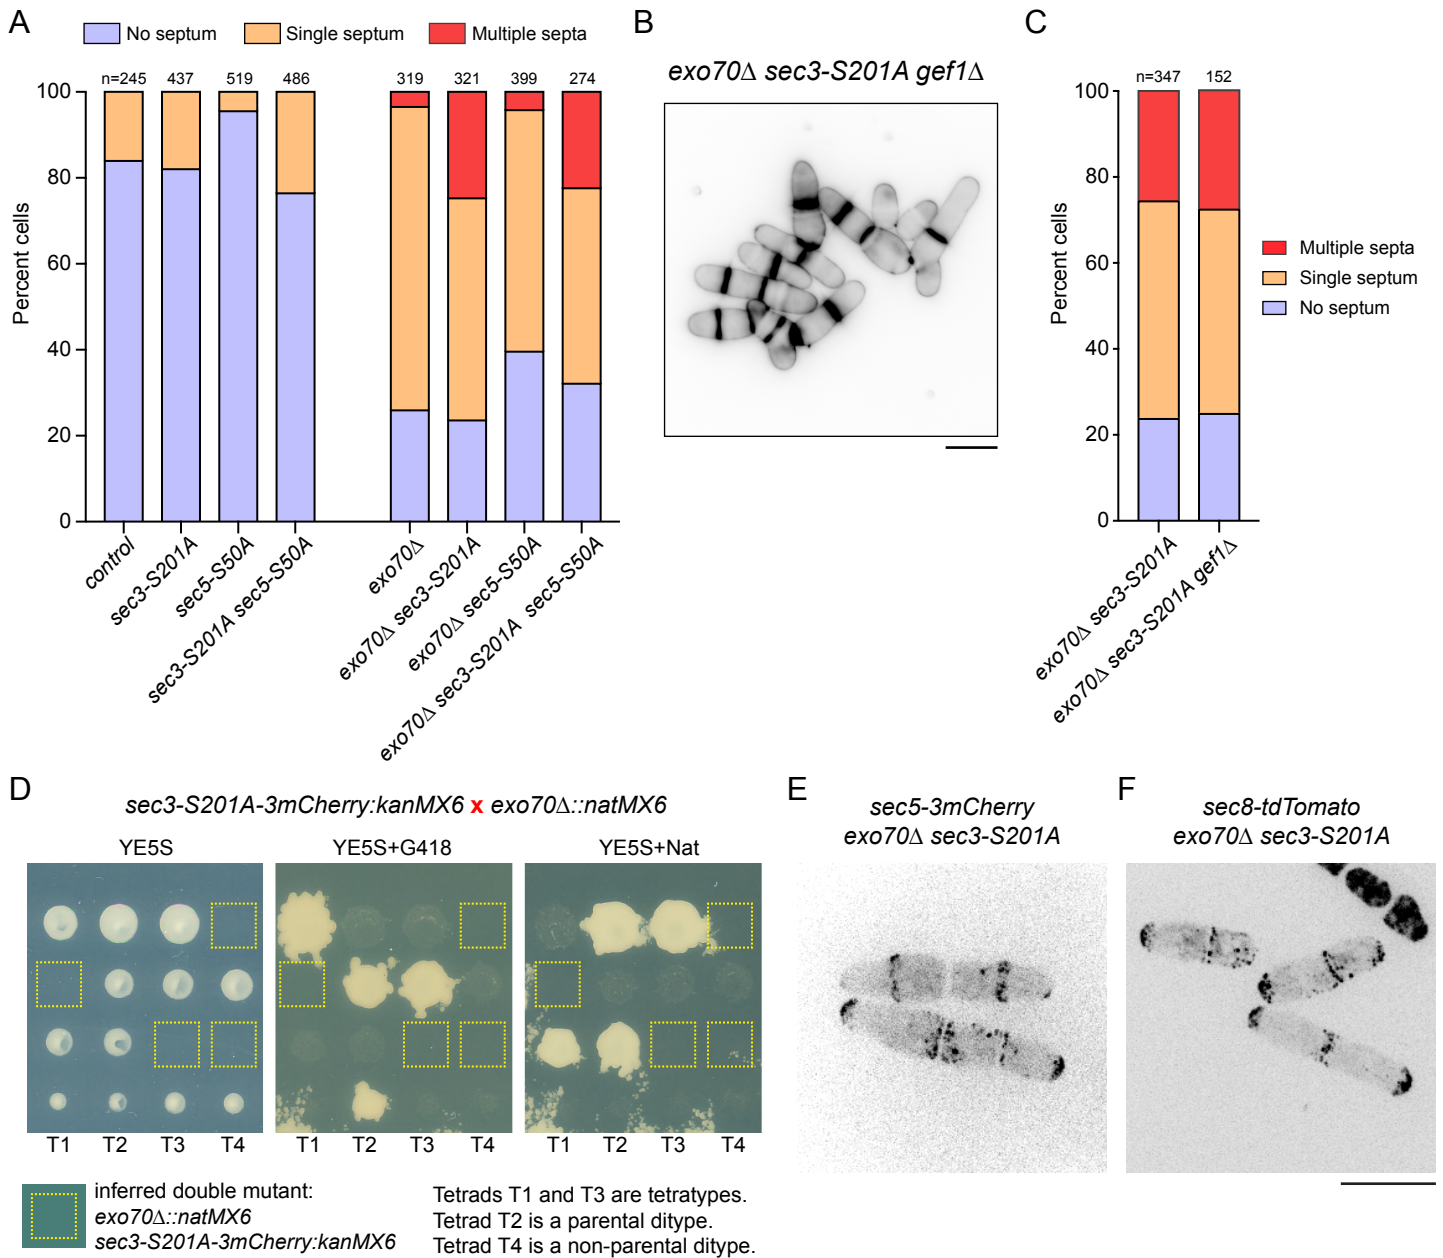

**Figure S5. Further characterization of *sec3-S201A* and *sec5-S50A* phenotypes. Related to Figure 7.**

(A) Septation index in cells of the indicated genotypes, grown at 36°C. See also Figure 7D

(B) Calcofluor staining of *exo70Δ sec3-S201A gef1Δ* cells.

(C) Septation index in cells of the indicated genotypes (25°C). Data in left-hand column are reproduced from Figure 7D.

(D) *sec3-S201A-3mCherry* is synthetically lethal with *exo70Δ*. As a result, Sec3-S201A-3mCherry localization in *exo70Δ* background cannot be investigated.

(E and F) Localization of Sec5-3mCherry (E) and Sec8-tdTomato (F) to cell tips and the septation zone in *exo70Δ sec3-S201A* backgrounds. In both strains, joined sister cells indicate cell-separation defects (see also Figure 7).

Bars, 10 μm. Imaging experiments and genetic cross for (A-F) were performed once.
